# Supplementary material
Source: PubMed Central journal article supplement (PMC2448857)
Supplement: 0711232105_Supplemental_PDF.pdf [file 0711232105_Supplemental_PDF.pdf]

# Supporting Information

Jeffrey *et al.* 10.1073/pnas.0711232105

## SI Text

**Reagents.** Reagents were from Sigma unless otherwise indicated. The following drugs were used: 10  $\mu\text{M}$  nifedipine, 25  $\mu\text{M}$  E64D, 100  $\mu\text{M}$  diazoxide, 1  $\mu\text{M}$  thapsigargin, and 100  $\mu\text{M}$  ALLM (Calbiochem). Palmitic acid (Nu-Check Prep N-16-A) was dissolved in 65 mM NaOH and complexed with 20% essentially fatty acid-free BSA (Sigma). The complex was added to DMEM media or RPMI 1640 media containing 10% FBS and 2% penicillin–streptomycin for a final molar ratio of 6:1 palmitate (1.5 mM) to BSA, unless otherwise indicated. A vehicle control was included for each experiment.

**Animals.** CPE<sup>fat/fat</sup> mice on the C57BL/6J background and littermate controls were obtained from The Jackson Laboratories. Intraperitoneal glucose tolerance tests (IPGTT; 2 g of glucose per kg of body weight) were performed on males after a 12-h fast. In some studies, male C57BL/6J mice were fed a high-fat diet (40% of calories from fat, TD88137; Harlan Teklad) for 6 months and compared to littermate controls fed normal chow. During this period, mice fed normal chow grew in weight from  $22.4 \pm 0.4$  g to  $33.1 \pm 0.7$  g, whereas mice fed high fat grew from  $22.2 \pm 0.3$  g to  $42.7 \pm 1.2$  g ( $P > 0.05$ ). Fasting blood sugars in chow-fed mice increased modestly ( $5.4 \pm 0.2$  to  $6.5 \pm 0.7$ ), whereas high-fat-fed mice showed a robust increase in 12-h fasting glucose ( $6.0 \pm 0.3$  to  $9.5 \pm 0.5$ ). All studies were approved by the University of British Columbia Animal Care Committee in accordance with national guidelines.

**Cell Culture.** Human islets were provided by either the Washington University Islet Transplantation Center or the Centre for Human Islet Transplant and  $\beta$ -cell Regeneration at the University of British Columbia and cultured as described (1–3). Our protocol (4) for isolating islets from male 3- to 4-month-old C57BL/6J mice is a technique modified from the original described by Lacy and Kostianovsky (5), with a filtration step adapted from Salvalaggio *et al.* (6). MIN6 cells were cultured in DMEM (GIBCO/Invitrogen) with 10% FCS, antibiotics, and 25 mM glucose unless otherwise indicated. Hormone release or hormone contents from MIN6 cells and human islets was assessed by static incubation or perfusion, as described (7). Insulin and proinsulin were assayed with Linco RIA or ELISA, respectively.

**Immunofluorescent Staining.** MIN6 cells plated onto polylysine-coated coverslips were fixed in fresh 4% paraformaldehyde for 10 min, permeabilized with Triton X-100 for 10 min, and blocked with goat serum. CPE was detected by using a monoclonal primary antibody (BD Biosciences) and goat secondary antibody conjugated to FITC (Jackson ImmunoResearch). Primary antibodies to insulin (Linco) or the Golgi marker GM130 (BD Transduction Laboratories) were detected with goat secondary antibodies conjugated to Texas red (Jackson ImmunoResearch). LysoTracker red (70 nM; Molecular Probes) was loaded into cells at 37°C for 30 min. Unless otherwise indicated,  $\beta$ -cell area and  $\alpha$ -cell area were stained using guinea pig anti-insulin antibody and rabbit anti-glucagon antibody (Linco/Millipore). Proliferation was measured with anti-PCNA. CPE-cleaved mature insulin was detected with a monoclonal antibody, clone mAB1, from Biodesign/Meridian. Cells and pancreas sections were mounted in Vectashield solution with DAPI, and imaged by using a Zeiss  $\times 100$  (1.45 numerical aperture) objective, individual filter cubes for each color (Roper Scientific), and a CoolSnap HQ2 Camera.

Images were deconvolved by using Slidebook software (Intelligent Imaging Innovations). Staining of paraffin-embedded pancreas sections was performed by using standard methods.

**Cell Death and Apoptosis Assays.** For online, high-throughput imaging of cell death, cells were plated onto clear-bottom 96-well microplates (ViewPlate-96; PerkinElmer) and treated as indicated. The incorporation of propidium iodide (500 ng/ml added to wells) was monitored in the incubated chamber (37°C, 5% CO<sub>2</sub>) of a KineticScan Reader (Cellomics). Propidium iodide is a dye that is normally nonfluorescent but fluoresces brightly once it passes through the compromised plasma membrane of dying cells and binds to DNA. Two to four nonoverlapping images were taken from each well at 30-min intervals. The total number of propidium iodide positive cells was then counted from these two images using the Target Activation Bioapplication (Cellomics). The TUNEL assay (Roche) was performed according to the manufacturer's instructions on pancreas sections counterstained with DAPI and anti-insulin antibody (Linco/Millipore).

**Proteomic Analysis of MIN6 Cell and Human Islets.** Our methods for 2D-DIGE proteomics of human islets have been described (7). Briefly, lysates from control and palmitate-treated cells were labeled with fluorescently distinct Cy dyes and analyzed in the same 2D gel. The Typhoon 9400 imager (Amersham Biosciences) and Decyder-DIA software (Amersham Biosciences) were used to quantify individual spots, which were considered significantly different if they were  $>2$  standard deviations outside of the normalized distribution of gel feature intensities, corresponding to a  $\approx 1.4$ -fold change in volume ratio for these images. Significantly different spots were manually selected, using fold-change and resolution criteria, for sequencing by using either MALDI-TOF/TOF (Proteomics 4700; Applied Biosystems) or LC-MS/MS (Q-STAR XL; Applied Biosystems), under the conditions previously described (8).

**Immunoblot.** Cells were washed with PBS and detached in the presence of 100  $\mu\text{l}$  lysis buffer with PMSF. Cells were further lysed through sonication. Fifteen to 35  $\mu\text{g}$  of protein was separated in 12% SDS/PAGE gels and transferred onto PVDF membranes by using semidry transfer (BioRad). These membranes were incubated with I-Block (Applied Biosystems) with 0.1% Tween 20 (Sigma) for 1 h. Membranes were incubated with primary antibodies for either 2 h at 18°C or overnight at 4°C. Rabbit monoclonal antibody to cleaved caspase-3 was from Cell Signaling Technology. Rabbit polyclonal anti-CHOP antibody was from Santa Cruz Biotechnology. Unless otherwise indicated, all CPE blots used an antibody that targets the zinc-binding region of the protein (BD Biosciences). Polyclonal antibodies to the N and C termini of CPE were from Serotech and Chemicon, respectively. Carboxypeptidase D antibody was a gift from Catherine Too (Dalhousie University, Halifax, Canada). Antibodies to prohormone convertase-1/3 and prohormone convertase-2 were from Chemicon.

**shRNA-Mediated CPE Knockdown and CPE Overexpression.** CPE levels were reduced in MIN6 cells using a vector expressing shRNA sequences designed against CPE (GGT GGA ATG CAA GAC TTC AAT) from SuperArray. A scrambled shRNA sequence (GGA ATC TCA TTC GAT GCA TAC) purchased from SuperArray and GFP were used as controls. Plasmid DNA (2  $\mu\text{g}$ )

was transfected using Lipofectamine 2000 (Invitrogen), resulting in GFP expression in  $\approx 20\%$  of cells after 40 h. GFP-positive cells were sorted by fluorescence-activated cell sorting (BD FACS Vantage SE/DIVA).

CPE was transiently overexpressed in MIN6 cells. CPE plas-

mids, one under the control of the CMV promoter and another under the control of the rat insulin promoter, were kindly supplied by L. D. Fricker. CPE DNA (1  $\mu\text{g}$ ), or empty pcDNA3.1 vector, was transfected into MIN6 cells by using Lipofectamine 2000 (Invitrogen).

1. Johnson JD, et al. (2003) Increased islet apoptosis in Pdx1<sup>+/-</sup> mice. *J Clin Invest* 111:1147–1160.
2. Johnson JD, Misler S (2002) Nicotinic acid-adenine dinucleotide phosphate-sensitive calcium stores initiate insulin signaling in human beta cells. *Proc Natl Acad Sci USA* 99:14566–14571.
3. Johnson JD, et al. (2004) RyR2 and calpain-10 delineate a novel apoptosis pathway in pancreatic islets. *J Biol Chem* 279:24794–24802.
4. Lacy PE, Kostianovsky M (1967) Method for the isolation of intact islets of Langerhans from the rat pancreas. *Diabetes* 16:35–39.
5. Salvalaggio PR, et al. (2002) Islet filtration: a simple and rapid new purification procedure. *Transplantation* 74:877–879.
6. Luciani DS, Johnson JD (2005) Acute effects of insulin on beta-cells from transplantable human islets. *Mol Cell Endocrinol* 241:88–98.
7. Johnson JD, et al. (2006) Insulin protects islets from apoptosis via Pdx1 and specific changes in the human islet proteome. *Proc Natl Acad Sci USA* 103:19575–19580.
8. Bredemeyer AJ, et al. (2004) A proteomic approach for the discovery of protease substrates. *Proc Natl Acad Sci USA* 101:11785–11790.



Carboxypeptidase E: Spot 1650

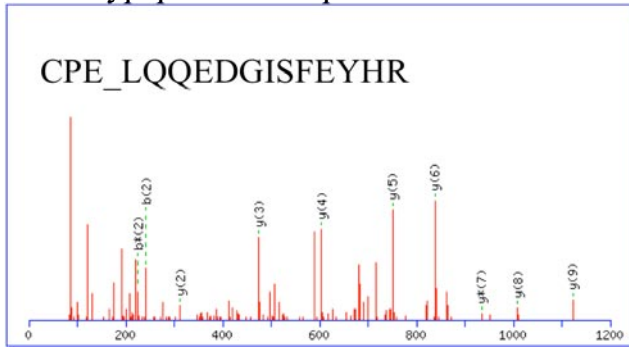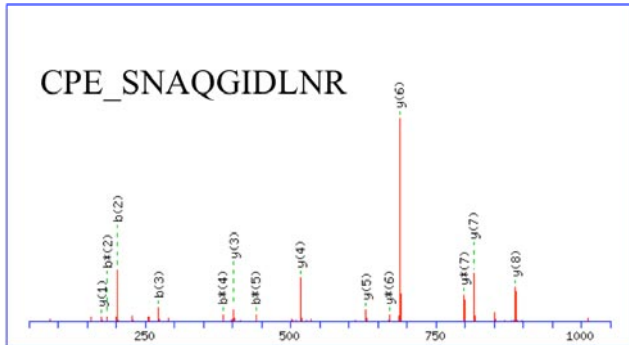

Carboxypeptidase E: Spot 1651

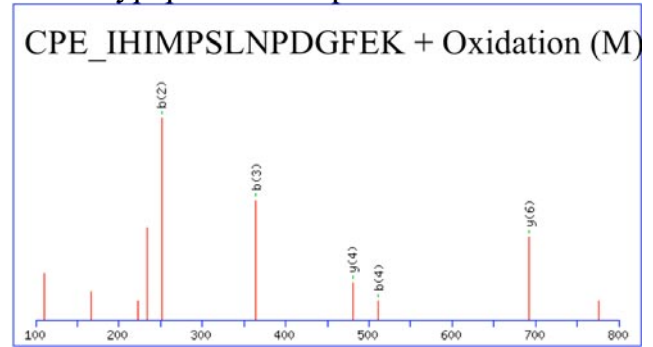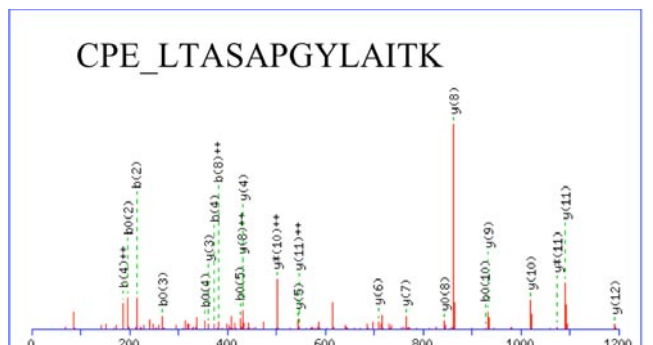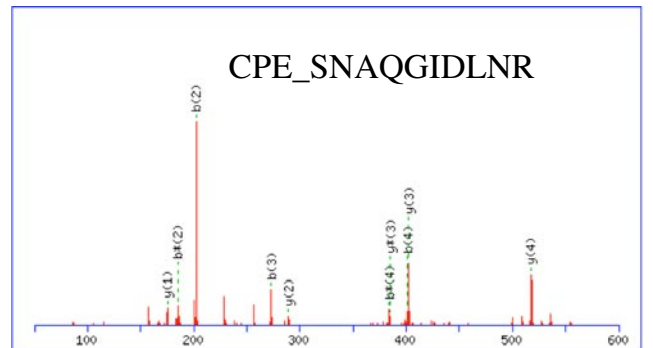

**Fig. S2.** Proteomic identification of CPE. Tandem mass spectra of mouse CPE peptides found in palmitate-treated MIN6 cells are shown. CPE was identified in two separate spots (1650, 1651). The spectra were acquired on a MALDI-TOF/TOF instrument as previously described (8).

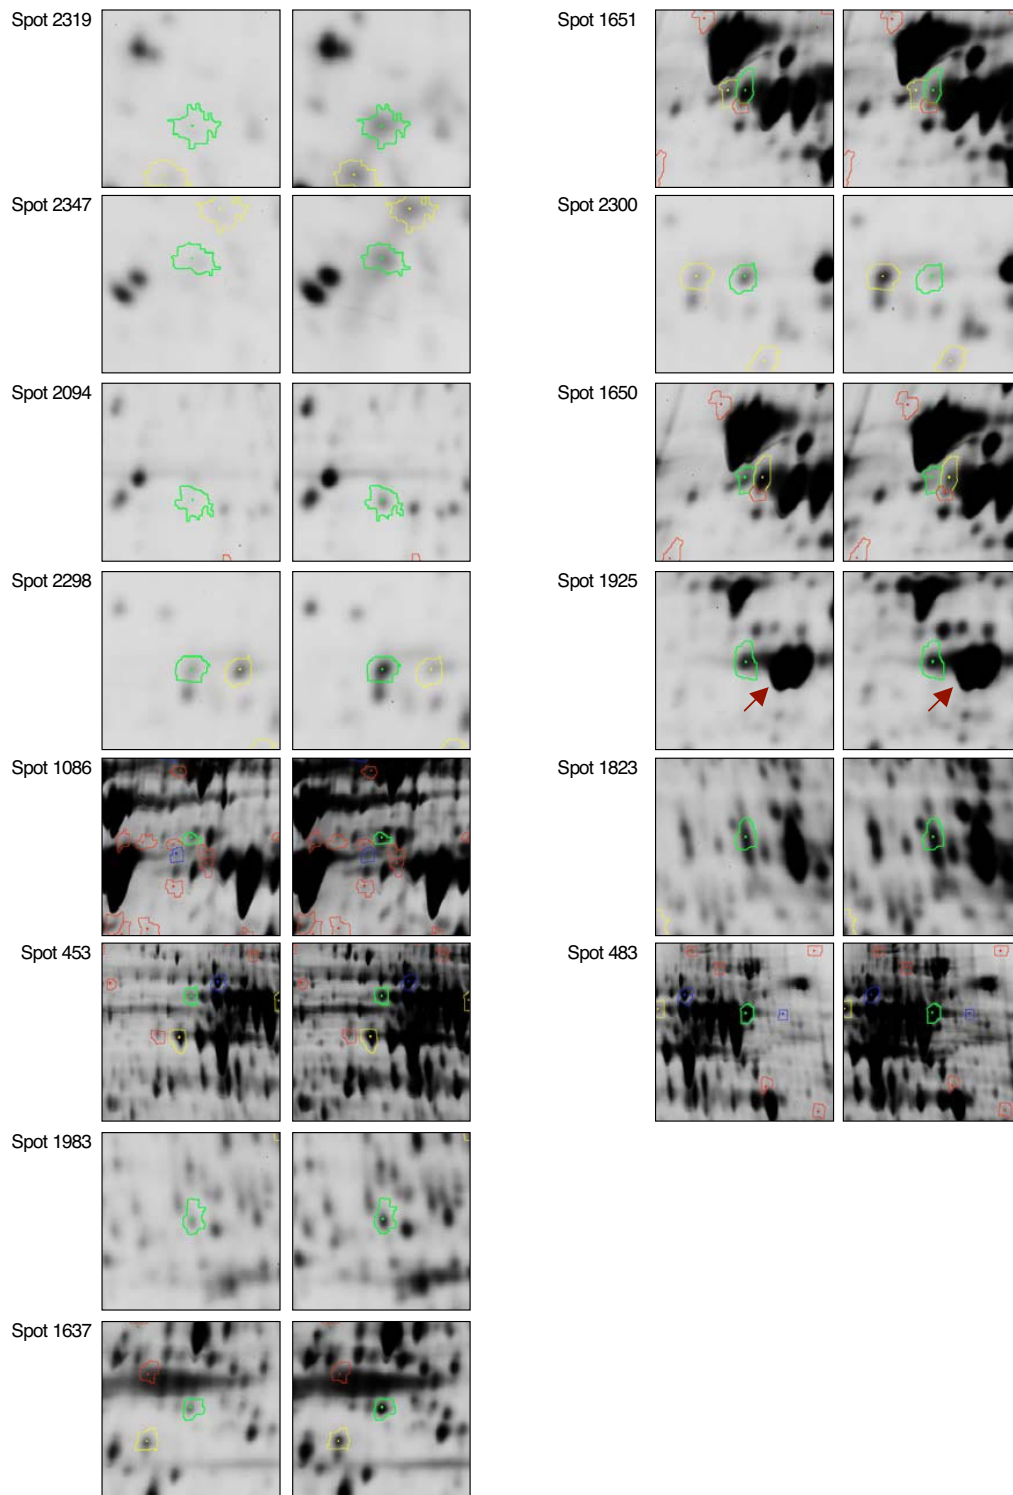

**Fig. S3.** Gel image detail of features that contained significantly different normalized spot volumes. Raw images of gel features that were significantly increased (*Left*) or decreased (*Right*) in palmitate-treated MIN6 cells are shown as volume plots. See [Table S1](#) for protein identifications. For each image, the identified spot is circled in green. Yellow denotes other identified spots nearby. Note that a single gene product may exist as multiple spots on a 2D protein gel. For example, we detected a spot identified as actin (spot 1925) that appears to be a minor isoform. The large (saturated) spot next to the identified spot is likely to be the major isoform of actin (arrow).

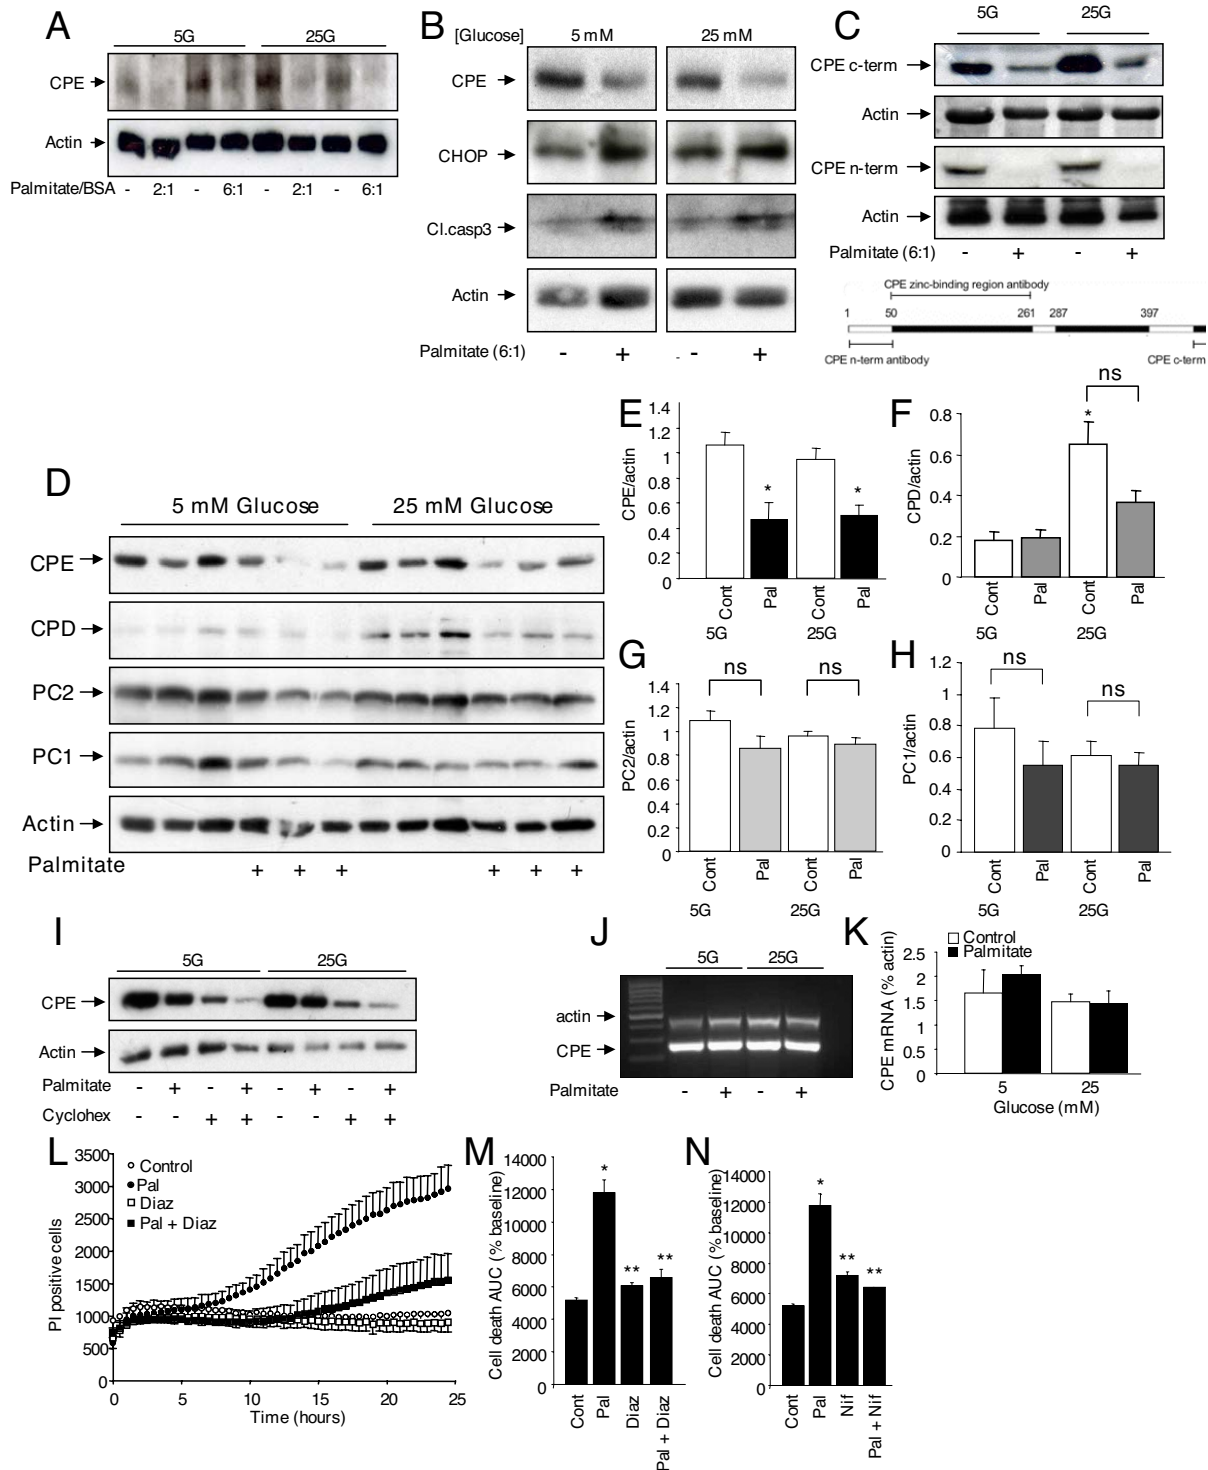

**Fig. S4.** Palmitate targets CPE specifically relative to other hormone processing enzymes. (A) Human islets treated for 48 h with two palmitate:BSA ratios ( $n = 3$ ). (B) Effects of 24-h palmitate treatment (6:1) on CPE, CHOP, and cleaved caspase-3 at both low and high glucose in human islets ( $n = 3$ ). (C) MIN6 cells treated for 24 h with 6:1 palmitate showed a decrease in CPE using C-terminal or N-terminal targeted antibodies. (D–H) Effects of 24-hour incubations of palmitate and glucose on prohormone convertase 2 (PC2), prohormone convertase 1/3 (PC1), and carboxypeptidase D. The asterisk denotes significant difference from 5 mM glucose control. (I) MIN6 cells treated with palmitate and/or 10  $\mu$ M cycloheximide for 24 h ( $n = 3$ ). (J and K) No differences in CPE gene expression in MIN6 cells treated with palmitate for 24 h at either low or high glucose were observed with RT-PCR ( $n = 3$ ). (G–K) Effects of 24-h incubations of palmitate and glucose on prohormone convertase 2 (PC2), prohormone convertase 1/3 (PC1) and carboxypeptidase D. The asterisk denotes significant difference from 5G control. (L and M) Propidium iodide incorporation in MIN6 cells at 25 mM glucose with palmitate and 100  $\mu$ M diazoxide ( $n = 3$ ). (N) Quantification of propidium iodide incorporation in MIN6 cells at 25 mM glucose with palmitate and 10  $\mu$ M nifedipine ( $n = 3$ ).



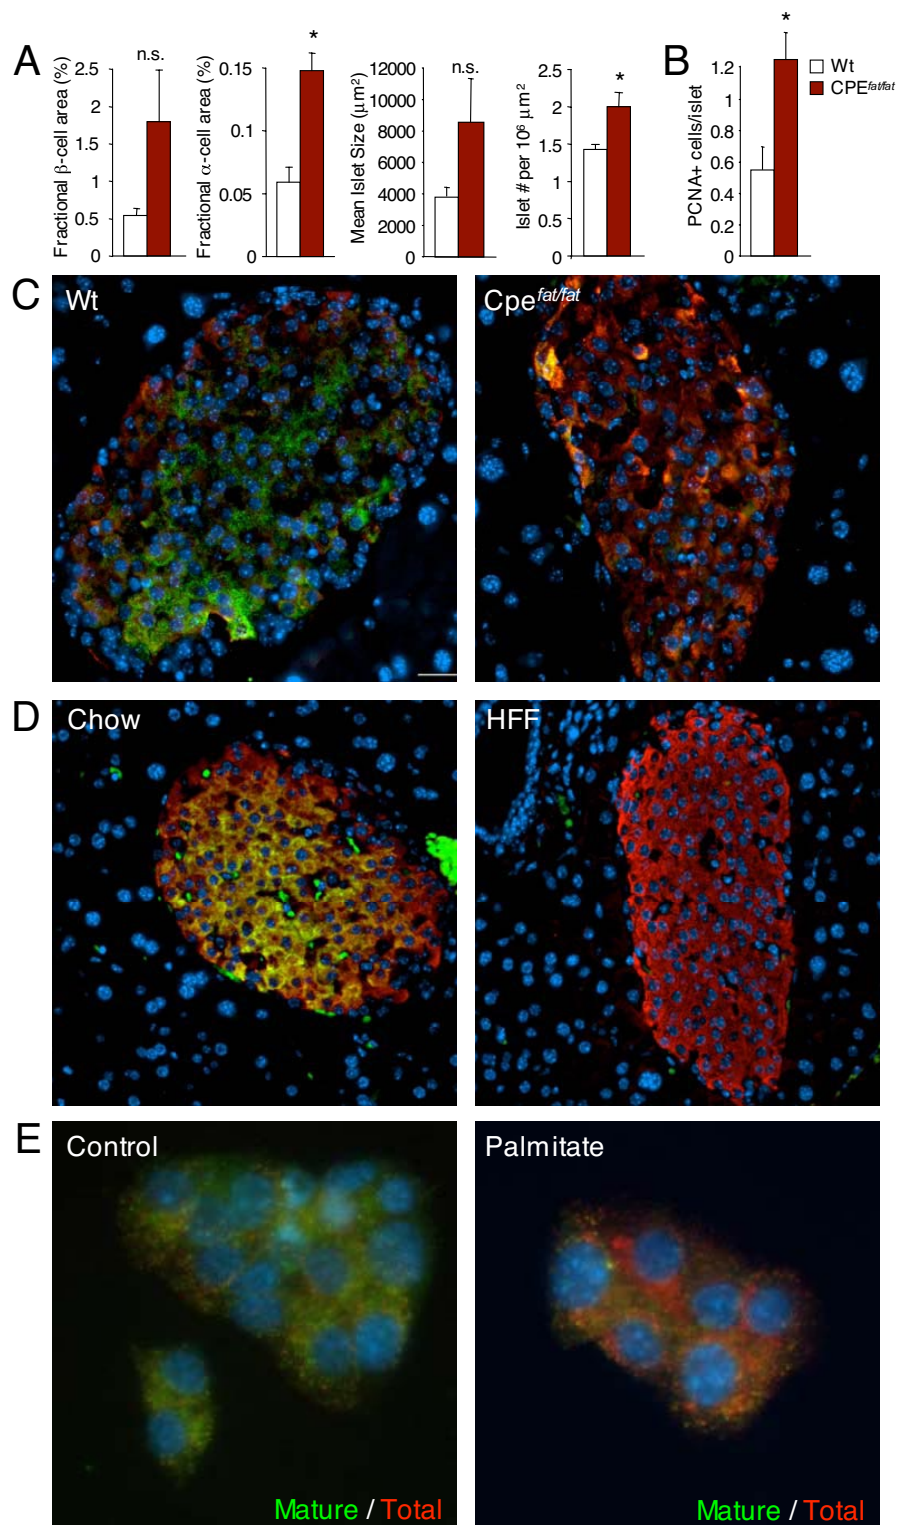

**Fig. S6.** Altered morphology and insulin maturation in CPE null and high-fat-treated islet cells. (A) Fractional  $\beta$ -cell and  $\alpha$ -cell area, average islet size (including single cells), and average number of islets (per 1,000,000  $\mu\text{m}^2$  pancreas area) were measured in pancreas sections from 3-month-old CPE<sup>fat/fat</sup> mice and compared with wild-type littermate controls ( $n = 3$ ). (B) PCNA-positive cells were quantified as an index of  $\beta$ -cell proliferation ( $n = 3$ ). (C) The ratio of mature insulin (i.e., CPE cleaved; green) to total insulin (uncleaved and cleaved; red) was substantially decreased in CPE null mice ( $n = 3$ ). (D) The ratio of mature insulin (green) to total insulin (red) was substantially decreased in high-fat-fed mice ( $n = 3$ ). (E) The ratio of mature insulin (green) to total insulin (red) was substantially decreased in MIN6 cells treated with 6:1 palmitate for 24 h and imaged with a  $\times 100$ , 1.45NA objective ( $n = 3$ ). Note that all pairs of images were acquired with the same exposure and thresholded with the same intensity values.



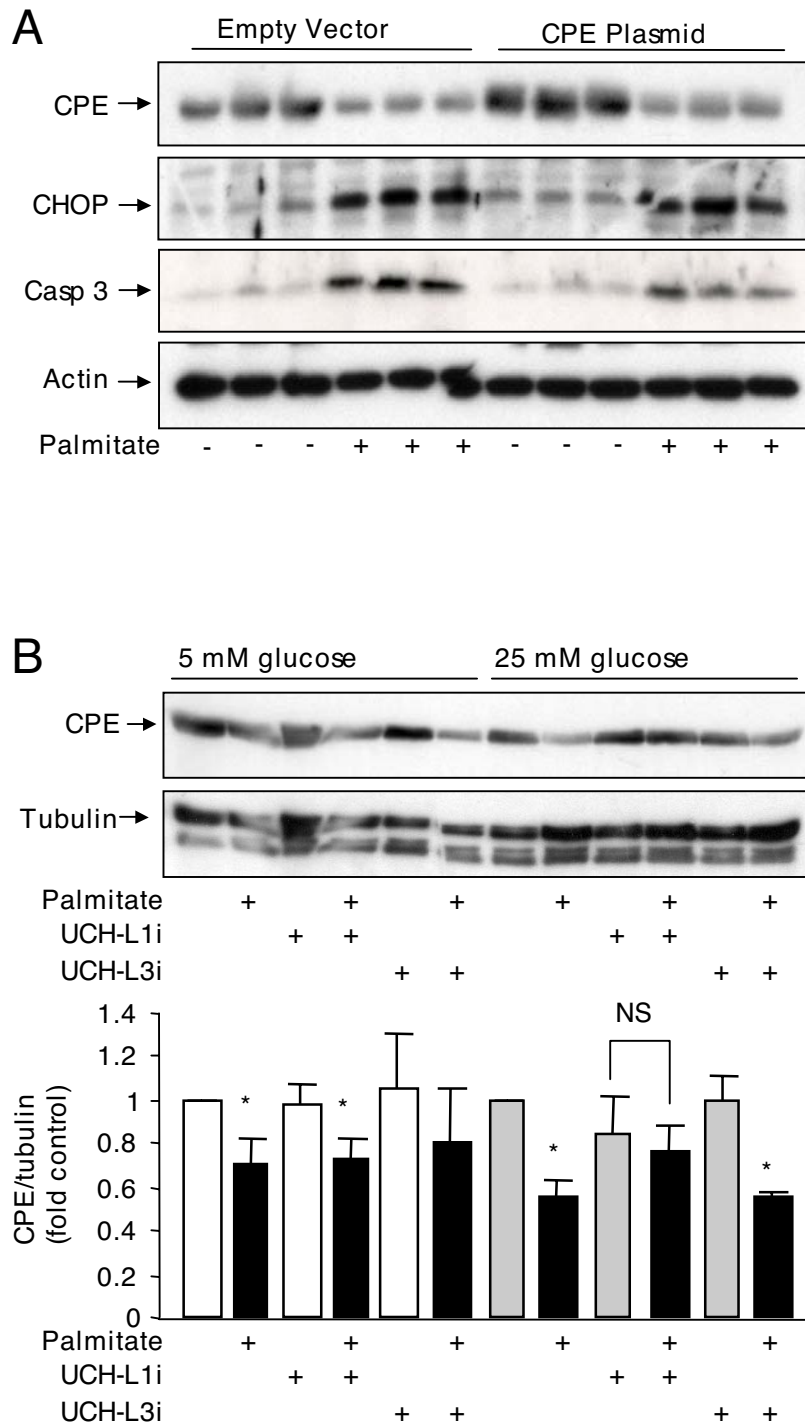

**Fig. S7.** The effect of UCH-L1 or UCH-L3 inhibitors on palmitate-treated MIN6 cells. (A) Raw Western blot image for CPE overexpression data quantified in Fig. 4L–N. (B) MIN6 cells were treated for 24 h with palmitate (Pal) and inhibitors for either UCH-L1 (10  $\mu$ M) or UCH-L3 (50  $\mu$ M), and the resulting Western blots were quantified ( $n = 3$ ).



**Table S1. Mass-spectrometry-based identification of differentially expressed spots in palmitate-treated MIN6 cells**

| Spot no.                | Protein                                            | GI code  | Fold  | Function                                     |
|-------------------------|----------------------------------------------------|----------|-------|----------------------------------------------|
| Significantly increased |                                                    |          |       |                                              |
| 2319                    | Ubiquitin carboxy-terminal hydrolase L1            | 6755929  | 2.57  | Protein degradation, apoptosis, Parkinson's  |
| 2347                    | NADH dehydrogenase Fe-S protein 8                  | 4505371  | 2.47  | Metabolism                                   |
| 2094                    | Phosphoprotein phosphatase 1-gamma Catalytic chain | 109652   | 2.02  | Signal transduction, studied in NIDDM muscle |
| 2094                    | Nucleoporin 37                                     | 21312212 | 2.02  | Nuclear pore complex, mitosis                |
| 2298                    | Proteosome alpha subunit 3                         | 3914438  | 1.69  | Protein degradation                          |
| 2298                    | Phosphoglycerate mutase                            | 12844989 | 1.69  | Glycolytic and gluconeogenic pathways        |
| 1086                    | NADH dehydrogenase Fe-S protein 1                  | 27807355 | 1.68  | Mitochondrial, increased in diabetic kidneys |
| 1086                    | Guanine nucleotide regulatory protein              | 3461880  | 1.68  | Cell cycle                                   |
| 453                     | ATP citrate lyase                                  | 8392839  | 1.46  | Makes acetyl-CoA for lipid synthesis         |
| 1983                    | 40-kDa protein kinase                              | 23879    | 1.46  | MAP kinase isoform                           |
| 1983                    | GDP-d mannose-4,6-dehydratase                      | 3258631  | 1.46  | Trafficking                                  |
| 1637                    | Kappa B motif-binding phosphoprotein               | 1083569  | 1.44  | Signal transduction                          |
| Significantly decreased |                                                    |          |       |                                              |
| 1651                    | Carboxypeptidase E                                 | 115893   | -3.64 | Proinsulin processing, diabetes, obesity     |
| 2300                    | Phosphoglycerate mutase                            | 12844989 | -2.87 | Glycolytic and gluconeogenic pathways        |
| 2300                    | Proteosome alpha subunit 3                         | 3814438  | -2.87 | Protein degradation                          |
| 1650                    | Carboxypeptidase E                                 | 109628   | -2.85 | Proinsulin processing, diabetes, obesity     |
| 1925                    | Actin (fragment)                                   | 71620    | -1.50 | Cytoskeleton                                 |
| 1823                    | DNAJ (Hsp40) homolog, subfamily A, member 1        | 6680297  | -1.34 | Motorneuron degeneration                     |
| 483                     | ATP citrate lyase                                  | 8392839  | -1.32 | Makes acetyl-CoA for lipid synthesis         |

**Table S2. Mass spectrometry-based identification of differentially expressed spots in palmitate-treated human islets**

| Spot no.                | Protein                                            | GI code  | Fold  | Function                                           |
|-------------------------|----------------------------------------------------|----------|-------|----------------------------------------------------|
| Significantly increased |                                                    |          |       |                                                    |
| 3818                    | Glucagon                                           | 121481   | 1.68  | Islet hormone, glucose homeostasis                 |
| 527                     | Protein disulfide isomerase, pancreatic            | 5803119  | 1.58  | Chaperone                                          |
| 825                     | DNAK-type molecular chaperone HSP70                | 483005   | 1.55  | Chaperone                                          |
| 740                     | $\alpha$ -2-hs-glycoprotein                        | 27806751 | 1.47  | Endocytosis, brain and bone development, apoptosis |
| 2891                    | Histone H4                                         | 11121217 | 1.42  | Chromatin structure                                |
| 2694                    | Histone H2B                                        | 70716    | 1.37  | Chromatin structure                                |
| 2697                    | Histone H2B                                        | 70716    | 1.34  | Chromatin structure                                |
| Significantly decreased |                                                    |          |       |                                                    |
| 1112                    | Carboxypeptidase E                                 | 4503009  | -2.11 | Proinsulin processing, diabetes, obesity           |
| 3378                    | GC31613                                            | 34876364 | -1.82 | Chromatin structure?                               |
| 1662                    | <i>N</i> -acetylneuraminic adic phosphate synthase | 12056473 | -1.59 | Sialic acid synthesis                              |
| 2924                    | Prosaposin                                         | 11386147 | -1.46 | Lipid binding and presentation in lysosomes        |
| 3390                    | Histone H2B-613                                    | 27693390 | -1.39 | Chromatin structure                                |
